# Supplementary material for: Increased Tenascin C, Osteopontin and HSP90 Levels in Plasmatic Small Extracellular Vesicles of Pediatric ALK-Positive Anaplastic Large Cell Lymphoma: New Prognostic Biomarkers?
Source: Diagnostics (Basel). 2021 Feb 6;11(2):253. doi: 10.3390/diagnostics11020253 (PMC7915848; doi:10.3390/diagnostics11020253)
Supplement: Supplementary file 1 [file diagnostics-11-00253-s001.zip › Supplementary_tables.xlsx]

## Sheet: Table S1
Supplementary Table S1. Clinical and biological characteristics of ALCL patients
MS_code	Western blot_ code	Age	Gender	Stage	Histology	Event	MDD	SPP1 fold of HD	TNC fold of HD	HSP90AA1 fold of HD	HSP90AB1 fold of HD	SAA1 fold of HD	SAA2 fold of HD	CRP fold of HD	LBP fold of HD
CR1	-	5.5989	M	3	common	no	pos	3.98816	2.52952	5.51105	8.92963	280.323	288.41	65.3264	2.03642
CR10	-	9.20465	F	3	common	no	neg	2.70263	2.47698	1.73675	4.30119	2.06668	1.36845	8.63201	2.90012
CR11	-	10.8118	M	3	common	no	pos	4.69942	5.38156	10.4635	13.1527	285.686	351.194	42.4543	4.52685
CR12	-	11.5236	M	2	common	no	pos	3.78218	1.29154	1.03983	2.85389	1.3337	0.924679	1.10711	2.75136
CR13	-	16.6817	M	3	common	no	neg	1.53164	0.701282	0.688252	0.42456	1.19077	0.637662	0.522587	0.722234
CR14	-	7.72074	M	3	common	no	neg	2.38524	1.06159	1.51444	1.11232	191.62	184.681	238.574	4.01139
CR2	5	6.28337	M	4	na	no	pos	3.1175	2.75392	2.69644	0.93484	24.108	51.8255	57.9099	3.44696
CR3	8	15.5838	M	3	na	no	neg	2.62114	4.45797	1.74956	1.71764	85.8103	69.779	76.6483	4.92567
CR4	9	7.6742	M	3	non common	no	pos	6.79646	2.62347	5.01564	3.81488	26.3015	24.292	21.0757	3.11842
CR5	-	14.8172	M	3	non common	no	pos	1.85265	2.22665	5.48146	3.72731	8.21545	5.00375	16.6587	1.82904
CR6	7	3.92882	F	1	na	no	neg	2.07473	0.780515	5.7256	3.84315	0.922745	0	3.93922	3.18195
CR7	-	6.71595	F	4	na	no	pos	5.13739	8.95572	15.1995	17.3424	417.727	507.62	40.4418	6.73291
CR8	-	12.3231	F	3	common	no	pos	4.13418	7.07353	10.6154	8.61854	274.924	221.461	147.294	5.78648
CR9	-	11.4442	M	3	common	no	pos	6.55894	2.04334	8.51519	11.836	11.5327	13.5431	30.6833	7.26276
REC1	-	8.71732	M	3	non common	yes	neg	1.84627	5.48701	31.8767	7.31454	25.6295	14.8862	47.7391	6.12186
REC2	-	15.5647	M	3	common	yes	pos	8.45142	1.86857	4.52577	3.72586	207.372	365.477	518.671	5.60456
REC3		17.7084	M	4	na	yes	pos	4.99252	3.91181	57.4504	77.2161	1159.21	732.933	151.686	101.506
REC4		6.55168	F	4	common	yes	pos	17.5121	6.21903	34.7621	30.4406	613.152	584.391	594.751	50.388
REC5	-	5.96304	F	3	non common	yes	pos	1.44203	3.25522	4.31211	2.13667	2.87964	4.45867	6.19584	1.76318
REC6	-	12.1916	F	4	na	yes	pos	1.15383	1.78175	8.51327	3.74369	14.7933	10.7495	12.2145	5.16475
-	1	3.09103	M	1	common	no	neg	-	-	-	-	-	-	-	-
-	2	18.4805	M	3	common	no	neg	-	-	-	-	-	-	-	-
-	3	10.4312	F	3	common	no	pos	-	-	-	-	-	-	-	-
-	4	2.84463	M	1	non common	no	neg	-	-	-	-	-	-	-	-
-	6	11.6331	F	3	non common	no	pos	-	-	-	-	-	-	-	-

## Sheet: Table S2
Supplementary Table S2. List of proteins with different relative abundance in ALCL compared to healthy donors
HGNC_symbol	UniProtKB	log2FoldChange	Adj P-value	Coverage [%]	# Unique Peptides	Score Sequest HT
SAA1	P0DJI8	7.50415	0.0194	72.1311	8	750.77
SAA2	P0DJI9	7.41199	0.0614	66.3934	7	660.13
CRP	P02741	6.69802	0.0211	39.7321	11	213.67
EIF3J	O75822	6.60708	0.0211	18.6047	4	12.31
USP15	Q9Y4E8	4.87166	0.035	16.106	11	45.21
SNCA	P37840	4.30015	0.0211	49.2857	6	46.66
PSMB4	P28070	3.98145	0.0964	23.8636	4	8.29
SDC1	P18827	3.79549	0.0194	9.35484	2	121.99
PTX3	P26022	3.71813	0.0699	53.5433	16	422.25
COL11A2	P13942	3.7116	0	5.76037	5	46.13
LBP	P18428	3.48386	0.0194	49.896	27	1010.6
HSP90AA1	P07900	3.44218	0.0265	64.5199	41	2915.64
HSP90AB1	P08238	3.3721	0.0286	69.1989	25	1420.13
ASNA1	O43681	3.34164	0.0699	37.3563	9	42.22
TFRC	P02786	3.25903	0.041	22.7632	14	34.29
SHBG	P04278	3.21581	0.0286	35.3234	7	21
SPTA1	P02549	3.05455	0.0511	4.13394	6	12.47
EMILIN2	Q9BXX0	2.8536	0.041	4.17854	4	10.98
VCAN	P13611	2.80765	0.0211	16.1366	5	636.41
NASP	P49321	2.78504	0.0614	4.43038	3	5.67
FBLN2	P98095	2.73023	0.0369	6.82372	6	27.18
EEF1D	P29692	2.58024	0.0771	14.374	5	32.87
NAP1L1	P55209	2.50835	0.0771	63.6829	16	457.58
ACAN	P16112	2.31708	0.0194	8.98551	15	310.11
FCN1	O00602	2.29216	0.0194	7.05521	2	13.27
C9	P02748	2.19031	0.0369	66.3685	34	1098.36
MIA3	Q5JRA6	2.1429	0.0699	10.3304	15	135.08
SPP1	P10451	2.11704	0.0211	55.414	2	510.81
SVEP1	Q4LDE5	2.06322	0.0286	2.10025	5	22.32
FMOD	Q06828	1.98124	0.0194	14.0957	4	21.59
NCAN	O14594	1.97223	0.035	13.0961	10	87.48
OMD	Q99983	1.95088	0.0211	34.4418	17	843.5
FBLN1	P23142	1.92657	0.041	42.3133	6	314.07
HSP90B1	P14625	1.82771	0.035	75.3425	63	3229.38
HSPG2	P98160	1.82076	0.0211	13.2544	33	249.99
CSPG4	Q6UVK1	1.80928	0.0194	3.14384	3	5.8
PLTP	P55058	1.74467	0.0369	49.0872	18	138.57
TNC	P24821	1.74154	0.0369	52.2275	80	1824.39
SEZ6L	Q9BYH1	1.7209	0.0699	5.66406	3	31.37
COL12A1	Q99715	1.67946	0.0194	4.83186	12	40.45
SEZ6L2	Q6UXD5	1.6488	0.0265	4.61538	4	6.55
LRG1	P02750	1.60942	0.0286	29.1066	7	79.18
RPLP2	P05387	1.60481	0.0771	76.5217	6	126.89
THBS2	P35442	1.49851	0.041	14.6758	11	482.35
NRP2	O60462	1.42075	0.0194	35.7451	26	282.8
GANAB	Q14697	1.40207	0.0771	45.2331	34	670.2
CANX	P27824	1.34033	0.0771	37.1611	16	243.93
NCAM1	P13591	1.24772	0.0699	42.5408	2	1046.72
GPX3	P22352	1.16347	0.0771	12.8319	2	10.3
C4BPB	P20851	0.637672	0.0872	46.8254	9	347.39
PGLYRP2	Q96PD5	-0.131912	0.0872	32.1181	11	204.89
CORO1A	P31146	-0.23013	0.0374	21.9089	8	20.16
HMGB1	P09429	-0.247279	0.0872	33.0233	7	125.52
COLEC11	Q9BWP8	-0.532661	0.0964	9.47368	2	13.56
ACTB	P60709	-0.751645	0.0964	73.3333	7	831.34
EHD1	Q9H4M9	-0.809827	0.0699	15.5431	6	25.4
PARVB	Q9HBI1	-0.993767	0.0964	24.6851	8	49.54
CD9	P21926	-1.13235	0.0771	15.3509	2	63.31
SPARC	P09486	-1.13336	0.0872	58.7459	18	981.09
MASP1	P48740	-1.15773	0.0286	28.7088	13	152.75
SERPINF2	P08697	-1.17171	0.0369	65.9878	25	1031.66
TGFBI	Q15582	-1.19699	0.0265	13.6164	8	33.88
FLNA	P21333	-1.20094	0.0964	38.7986	68	480.17
SDC4	P31431	-1.21782	0.0964	11.1111	2	29.24
PPIA	P62937	-1.23243	0.0369	58.1818	7	45.97
GP5	P40197	-1.24466	0.041	8.03571	3	19.25
PFN1	P07737	-1.24715	0.0369	52.8571	6	91.67
RSU1	Q15404	-1.25301	0.0771	15.1625	3	10.98
SELENOP	P49908	-1.29129	0.041	21.7848	10	184.57
MSN	P26038	-1.31871	0.0211	20.2773	12	117.45
ITGA2B	P08514	-1.3446	0.0964	47.8345	43	1007.37
ITGA6	P23229	-1.38947	0.0872	18.9381	14	47.87
STOM	P27105	-1.39473	0.0964	59.375	13	184.32
TGFB1	P01137	-1.41445	0.0614	23.8462	7	15.11
ACTN1	P12814	-1.42474	0.035	7.09677	6	14.37
RAP1B	P61224	-1.55407	0.0511	82.0652	4	245.11
NID2	Q14112	-1.58481	0.0369	22.1091	16	124.16
EMILIN1	Q9Y6C2	-1.61143	0.041	16.2402	12	37.78
MMRN1	Q13201	-1.67287	0.0211	49.3485	60	2797.33
CFL1	P23528	-1.87485	0.0211	54.8193	7	114.02
LTBP1	Q14766	-1.9388	0.0286	33.1203	3	561.56
PLEK	P08567	-2.23523	0.0872	32.2857	7	68.94
WDR1	O75083	-2.41954	0.0211	10.7261	4	8.55

## Sheet: Table S3
Supplementary Table S3. Cellular components distribution of upregulated proteins
GO_number	GO_Term	Count	%	PValue	Genes	Fold Enrichment	Benjamini	FDR
GO:0005576	extracellular region	32	0.413116	3.70813e-21	FCN1, CRP, NRP2, TFRC, NCAN, COL11A2, COL12A1, TNC, FBLN1, C4BPB, THBS2, FBLN2, HSP90B1, ACAN, C9, SPP1, EMILIN2, SVEP1, LBP, PLTP, SNCA, HSP90AA1, GPX3, OMD, HSPG2, VCAN, LRG1, SAA1, PTX3, CSPG4, FMOD, SHBG	7.24432	4.11602e-19	3.59689e-19
GO:0031012	extracellular matrix	14	0.180738	6.55138e-13	HSP90AA1, COL12A1, TNC, FBLN1, THBS2, HSPG2, FBLN2, HSP90B1, ACAN, VCAN, GANAB, CANX, EMILIN2, FMOD	17.2389	3.63601e-11	3.17742e-11
GO:0043202	lysosomal lumen	9	0.116189	6.17345e-11	ACAN, VCAN, HSP90AA1, NCAN, OMD, SDC1, CSPG4, FMOD, HSPG2	38.592	2.28417e-09	1.99608e-09
GO:0005615	extracellular space	19	0.245288	4.91584e-09	CRP, TFRC, GPX3, COL12A1, OMD, TNC, FBLN1, C4BPB, HSPG2, VCAN, LRG1, SPP1, SAA1, SAA2, PTX3, LBP, FMOD, PLTP, SNCA	5.14114	1.19977e-07	1.04845e-07
GO:0005796	Golgi lumen	8	0.103279	6.46485e-09	ACAN, VCAN, NCAN, OMD, SDC1, CSPG4, FMOD, HSPG2	30.3733	1.19977e-07	1.04845e-07
GO:0070062	extracellular exosome	26	0.335657	6.48525e-09	CRP, HSP90AB1, TFRC, COL12A1, FBLN1, FBLN2, HSP90B1, GANAB, PSMB4, C9, ASNA1, SPP1, RPLP2, NCAM1, LBP, HSP90AA1, GPX3, OMD, HSPG2, LRG1, CANX, SAA1, SAA2, SDC1, CSPG4, SHBG	3.37121	1.19977e-07	1.04845e-07
GO:0042470	melanosome	7	0.0903692	2.87589e-07	HSP90AA1, GANAB, HSP90AB1, TFRC, CANX, NAP1L1, HSP90B1	25.261	4.56034e-06	3.98516e-06
GO:0005578	proteinaceous extracellular matrix	9	0.116189	5.27381e-07	ACAN, VCAN, NCAN, COL11A2, OMD, EMILIN2, FBLN1, FMOD, FBLN2	12.24	7.31741e-06	6.39449e-06
GO:0016020	membrane	18	0.232378	3.31291e-05	HSP90AA1, NRP2, HSP90AB1, TFRC, TNC, NAP1L1, MIA3, HSP90B1, VCAN, GANAB, LRG1, CANX, RPLP2, SDC1, NCAM1, SVEP1, LBP, SNCA	2.98211	0.000408592	0.000357058
GO:0005604	basement membrane	5	0.0645494	5.9751e-05	ACAN, TNC, FBLN1, THBS2, HSPG2	23.0684	0.000663236	0.000579585
GO:0071682	endocytic vesicle lumen	3	0.0387297	0.000829665	HSP90AA1, SAA1, HSP90B1	68.34	0.00837208	0.00731614
GO:0005788	endoplasmic reticulum lumen	5	0.0645494	0.00174711	GANAB, CANX, COL11A2, COL12A1, HSP90B1	9.49167	0.0161608	0.0141225
GO:0005581	collagen trimer	4	0.0516396	0.00193917	FCN1, COL11A2, COL12A1, EMILIN2	15.847	0.0165575	0.0144692
GO:0009986	cell surface	7	0.0903692	0.00318014	HSP90AA1, HSP90AB1, TFRC, SDC1, CSPG4, NCAM1, LBP	4.70731	0.025214	0.0220339
GO:0005925	focal adhesion	6	0.0774593	0.00389349	TNC, RPLP2, SDC1, CSPG4, HSPG2, HSP90B1	5.59304	0.0288118	0.0251779
GO:1903561	extracellular vesicle	3	0.0387297	0.00799064	TFRC, COL12A1, FBLN2	21.8688	0.0554351	0.0484433
GO:0005840	ribosome	4	0.0516396	0.0100633	CANX, COL11A2, RPLP2, SNCA	8.78265	0.0657076	0.0574202
GO:0030424	axon	4	0.0516396	0.0217858	SPTA1, NRP2, CANX, SNCA	6.56721	0.134346	0.117401
GO:0016234	inclusion body	2	0.0258198	0.0473289	HSP90AB1, SNCA	40.4978	0.2765	0.241626
GO:0043025	neuronal cell body	4	0.0516396	0.052618	HSP90AA1, CANX, SEZ6L2, SEZ6L	4.62832	0.29203	0.255197
GO:0034364	high-density lipoprotein particle	2	0.0258198	0.0575446	SAA1, SAA2	33.1345	0.304164	0.265801
GO:0005789	endoplasmic reticulum membrane	6	0.0774593	0.0806993	ASNA1, CANX, MIA3, SEZ6L2, SEZ6L, HSP90B1	2.53698	0.393346	0.343735
GO:0016323	basolateral plasma membrane	3	0.0387297	0.0844029	HSP90AA1, HSP90AB1, TFRC	6.07467	0.393346	0.343735
GO:0048471	perinuclear region of cytoplasm	5	0.0645494	0.0850477	HSP90AA1, TFRC, SPP1, HSP90B1, SNCA	2.93462	0.393346	0.343735
GO:0043234	protein complex	4	0.0516396	0.0988153	HSP90AA1, NASP, CANX, SDC1	3.53864	0.43874	0.383403

## Sheet: Table S4
Supplementary Table S4. Biological processes distribution of upregulated proteins
GO_term	GO_description	Count	%	PValue	Genes	Fold Enrichment	Benjamini	FDR
GO:0007155	cell adhesion	12	0.154919	5.12399e-08	ACAN, VCAN, NRP2, NCAN, COL12A1, OMD, SPP1, TNC, EMILIN2, SVEP1, NCAM1, THBS2	8.95932	2.17769e-05	2.12645e-05
GO:0030203	glycosaminoglycan metabolic process	5	0.0645494	1.32421e-06	VCAN, NCAN, SDC1, CSPG4, HSPG2	59.0852	0.000281396	0.000274775
GO:0030198	extracellular matrix organization	7	0.0903692	1.91162e-05	ACAN, VCAN, NCAN, SPP1, TNC, FBLN1, HSPG2	12.2391	0.00270813	0.00264441
GO:0006953	acute-phase response	4	0.0516396	0.00018636	CRP, SAA1, SAA2, LBP	35.1481	0.0158406	0.0154679
GO:0030199	collagen fibril organization	4	0.0516396	0.00018636	ACAN, COL11A2, COL12A1, FMOD	35.1481	0.0158406	0.0154679
GO:0008228	opsonization	3	0.0387297	0.000354834	CRP, PTX3, LBP	102.808	0.0251341	0.0245427
GO:0030208	dermatan sulfate biosynthetic process	3	0.0387297	0.000518527	VCAN, NCAN, CSPG4	85.6735	0.0275467	0.0268986
GO:0042340	keratan sulfate catabolic process	3	0.0387297	0.000518527	ACAN, OMD, FMOD	85.6735	0.0275467	0.0268986
GO:0001501	skeletal system development	5	0.0645494	0.000624638	ACAN, VCAN, NCAN, COL11A2, COL12A1	12.5071	0.0294968	0.0288028
GO:0030207	chondroitin sulfate catabolic process	3	0.0387297	0.000712334	VCAN, NCAN, CSPG4	73.4344	0.0302742	0.0295619
GO:0006457	protein folding	5	0.0645494	0.00171992	HSP90AA1, GANAB, HSP90AB1, CANX, HSP90B1	9.51927	0.0664516	0.064888
GO:0030206	chondroitin sulfate biosynthetic process	3	0.0387297	0.00230175	VCAN, NCAN, CSPG4	41.1233	0.0815202	0.0796021
GO:0030206	chondroitin sulfate biosynthetic process	3	0.0387297	0.00230175	VCAN, NCAN, CSPG4	41.1233	0.0815202	0.0796021
GO:0018146	keratan sulfate biosynthetic process	3	0.0387297	0.00288441	ACAN, OMD, FMOD	36.7172	0.094298	0.0920792
GO:0007162	negative regulation of cell adhesion	3	0.0387297	0.00499958	TNC, FBLN1, MIA3	27.786	0.151773	0.148202
GO:0045429	positive regulation of nitric oxide biosynthetic process	3	0.0387297	0.00670528	HSP90AA1, HSP90AB1, PTX3	23.9089	0.189983	0.185513
GO:0008344	adult locomotory behavior	3	0.0387297	0.00968695	SEZ6L2, SEZ6L, SNCA	19.7708	0.25731	0.251255
GO:0006950	response to stress	3	0.0387297	0.0131529	HSP90AA1, HSP90AB1, HSP90B1	16.8538	0.328822	0.321085
GO:0022617	extracellular matrix disassembly	3	0.0387297	0.0199367	ACAN, SPP1, HSPG2	13.5274	0.423655	0.413687
GO:0042060~wound healing	wound healing	3	0.0387297	0.0219465	TNC, SDC1, MIA3	12.851	0.444156	0.433705
GO:0001649	osteoblast differentiation	3	0.0387297	0.0356277	VCAN, SPP1, TNC	9.8854	0.517688	0.505507
GO:0044267	cellular protein metabolic process	3	0.0387297	0.0447817	SAA1, HSPG2, SNCA	8.71256	0.576816	0.563244
GO:0007417	central nervous system development	3	0.0387297	0.0461539	ACAN, VCAN, NCAN	8.56735	0.576924	0.563349
GO:0007411	axon guidance	3	0.0387297	0.075751	SPTA1, NRP2, NCAM1	6.46592	0.804855	0.785917
GO:0006898~receptor-mediated endocytosis	receptor-mediated endocytosis	3	0.0387297	0.098922	HSP90AA1, SAA1, HSP90B1	5.52732	0.913953	0.892448

## Sheet: Table S5
Supplementary Table S5. Molecular function distribution of upregulated proteins
GO_term	GO_description	Count	%	Genes	Fold Enrichment	PValue	Benjamini	FDR
GO:0005509	calcium ion binding	13	0.167829	CRP, NCAN, FBLN1, THBS2, HSPG2, FBLN2, HSP90B1, SPTA1, ACAN, VCAN, CANX, SVEP1, SNCA	6.65372	2.48731e-07	3.35787e-05	3.08426e-05
GO:0005201	extracellular matrix structural constituent	6	0.0774593	ACAN, VCAN, NCAN, COL11A2, FBLN1, FBLN2	32.8637	9.14277e-07	6.17137e-05	5.66852e-05
GO:0030246	carbohydrate binding	7	0.0903692	FCN1, ACAN, VCAN, GANAB, NCAN, CANX, SVEP1	13.1064	1.26798e-05	0.000570591	0.000524098
GO:0001948	glycoprotein binding	5	0.0645494	HSP90AA1, HSP90AB1, TFRC, CANX, SDC1	28.2291	2.64895e-05	0.000894019	0.000821173
GO:0046790	virion binding	3	0.0387297	CRP, PTX3, HSP90B1	110.093	0.000308464	0.00832853	0.00764991
GO:0005540	hyaluronic acid binding	3	0.0387297	ACAN, VCAN, NCAN	47.8667	0.00169644	0.0381699	0.0350598
GO:0051082	unfolded protein binding	4	0.0516396	HSP90AA1, HSP90AB1, CANX, HSP90B1	13.3447	0.00313089	0.0603814	0.0554615
GO:0008201	heparin binding	4	0.0516396	NRP2, SAA1, THBS2, FMOD	9.17446	0.00886083	0.108746	0.0998857
GO:0042802	identical protein binding	6	0.0774593	USP15, HSP90AA1, TFRC, FBLN1, PTX3, SNCA	2.93975	0.0480297	0.3242	0.297784
GO:0005515	protein binding	30	0.387297	FCN1, CRP, USP15, HSP90AB1, TFRC, COL11A2, MIA3, C4BPB, THBS2, HSP90B1, SPTA1, ACAN, PSMB4, ASNA1, SPP1, EMILIN2, RPLP2, LBP, SNCA, HSP90AA1, GPX3, NAP1L1, HSPG2, VCAN, NASP, EEF1D, EIF3J, CANX, SDC1, PTX3	1.2532	0.0636623	0.390655	0.358824
GO:0008022	protein C-terminus binding	3	0.0387297	SDC1, FBLN1, HSPG2	6.04909	0.0846872	0.457311	0.420048
